# Supplementary material for: Relating alkaline stability to the structure of quaternary phosphonium cations
Source: Royal Society of Chemistry journal article supplement (doi:10.1039/c8ra03440k), 2018-01-01
Supplement: c8ra03440k1.pdf [file c8ra03440k1.pdf]

## Supporting Information

### Relating alkaline stability to structure of quaternary phosphonium cations

Bingzi Zhang<sup>a,†</sup>, Hai Long<sup>b,†</sup>, Robert B Kaspar<sup>a</sup>, Junhua Wang<sup>a</sup>, Shuang Gu<sup>c</sup>, Zhongbin Zhuang<sup>d,e</sup>, Bryan Pivovar<sup>b</sup> and Yushan Yan<sup>a,d,e,\*</sup>

<sup>a</sup>Department of Chemical and Biomolecular Engineering, University of Delaware, Newark, DE 19716, United States

<sup>b</sup>National Renewable Energy Laboratory, MS ESIF302, 15013 Denver West Parkway, Golden, Colorado 80401, United State

<sup>c</sup>Department of Mechanical Engineering, Wichita State University, Wichita, KS 67260, United States

<sup>d</sup>State Key Lab of Organic–Inorganic Composites, Beijing University of Chemical Technology, Beijing 100029, China

<sup>e</sup>Beijing Advanced Innovation Center for Soft Matter Science and Engineering, Beijing University of Chemical Technology, Beijing 100029, China

<sup>†</sup>These authors contribute equally.

### Corresponding Author

\*E-mail: yanys@udel.edu

### Materials and Characterization

All the chemicals were purchased from Sigma-Aldrich and used as received. The <sup>1</sup>H NMR spectra were measured in deuterated solvents on a Bruker AV400 spectrometer (<sup>1</sup>H, 400 MHz). The <sup>1</sup>H NMR chemical shifts are expressed as  $\delta$  downfield from tetramethylsilane (TMS) and calibrated to the residual proton of the deuterated solvent ( $\delta$  = 7.26 ppm for chloroform-d). The <sup>31</sup>P NMR spectra were measured in deuterated

solvents on a Bruker AV400 spectrometer ( $^{31}\text{P}$ , 161 MHz). The  $^{31}\text{P}$  NMR chemical shifts are expressed as downfield from external 85%  $\text{H}_3\text{PO}_4$ .

### **General procedure for synthesizing methyl based quaternary phosphonium salts**

A mixture of the corresponding phosphine (10 mmol) and 2 mL iodomethane (32 mmol) was stirred at room temperature for 24 h. The precipitated product was collected by filtration, rinsed three times with THF, and dried under vacuum.<sup>[1]</sup>

Methyl tris(2,4,6-trimethylphenyl)phosphonium iodide (MTPP-(2,4,6-Me)-I) (cation (1)):  $^1\text{H}$  NMR (400 MHz,  $\text{CDCl}_3$ )  $\delta$  7.06 (6H, dd,  $J = 84.0, 3.2$  Hz), 2.94 (3H, d,  $J = 11.2$  Hz), 2.35 (18H, d,  $J = 5.2$  Hz), 1.91 (9H, s).  $^{31}\text{P}$  NMR (161 MHz,  $\text{CDCl}_3$ )  $\delta$  6.53 (s). Yield: 95 wt%.

Methyl tris(2,4,6-trimethoxyphenyl)phosphonium iodide (MTPP-(2,4,6-MeO)-I) (cation (2)):  $^1\text{H}$  NMR (400 MHz,  $\text{CDCl}_3$ )  $\delta$  6.14 (6H, d,  $J = 4.8$  Hz), 3.90 (9H, s), 3.61 (18H, s), 2.47 (3H, d,  $J = 15.2$  Hz).  $^{31}\text{P}$  NMR (161 MHz,  $\text{CDCl}_3$ )  $\delta$  3.79 (s). Yield: 96 wt%.

Methyl tris(2,6-trimethoxyphenyl)phosphonium iodide (MTPP-(2,6-MeO)-I) (cation (4)):  $^1\text{H}$  NMR (400 MHz,  $\text{CDCl}_3$ )  $\delta$  7.54 (3H, t,  $J = 8.4$  Hz), 6.63 (6H, dd,  $J = 8.8, 5.6$  Hz), 3.59 (18H, s), 2.60 (3H, d,  $J = 15.2$  Hz).  $^{31}\text{P}$  NMR (161 MHz,  $\text{CDCl}_3$ )  $\delta$  1.84 (s). Yield: 92 wt%.

Methyl tris(*o*-methoxyphenyl)phosphonium iodide (MTPP-(*o*-MeO)-I) (cation (6)):  $^1\text{H}$  NMR (400 MHz,  $\text{CDCl}_3$ )  $\delta$  7.80 (3H, t,  $J = 7.6$  Hz), 7.25 (3H, t,  $J = 6.4$  Hz), 7.13 (3H, td,  $J = 7.6, 2.8$  Hz), 6.97 (3H, ddd,  $J = 23.6, 8.0, 1.6$  Hz), 3.87 (9H, s), 2.74 (3H, d,  $J = 15.2$  Hz).  $^{31}\text{P}$  NMR (161 MHz,  $\text{CDCl}_3$ )  $\delta$  20.1 (s). Yield: 89 wt%.

Methyl tris(*o*-methylphenyl)phosphonium iodide (MTPP-(*o*-Me)-I) (cation (8)):  $^1\text{H}$  NMR (400 MHz,  $\text{CDCl}_3$ )  $\delta$  7.73 (3H, t,  $J = 7.6$  Hz), 7.55 (3H, t,  $J = 6.0$  Hz), 7.43 (3H, t,  $J = 8.0$  Hz), 7.23 (3H, dd,  $J = 15.2, 7.6$  Hz), 3.20 (3H, d,  $J = 13.2$  Hz), 2.40 (9H, s).  $^{31}\text{P}$  NMR (161 MHz,  $\text{CDCl}_3$ )  $\delta$  21.7 (s). Yield: 86 wt%.

Methyl tris(*p*-methoxyphenyl)phosphonium iodide (MTPP-(*p*-MeO)-I) (cation (9)): <sup>1</sup>H NMR (400 MHz, CDCl<sub>3</sub>) δ 7.59 (6H, dd, *J* = 12.8, 8.8 Hz), 7.14 (6H, dd, *J* = 2.8 Hz), 3.89 (9H, s), 2.93 (3H, d, *J* = 13.2 Hz). <sup>31</sup>P NMR (161 MHz, CDCl<sub>3</sub>) δ 18.8 (s). Yield: 91 wt%.

#### **General procedure for synthesizing benzyl based quaternary phosphonium salts**

A mixture of the corresponding phosphine (10 mmol) and 2.54 g benzyl chloride (20 mmol) in 10 mL THF was stirred at 60 °C for 24 h. The precipitated product was collected by filtration, rinsed three times with THF, and dried under vacuum.

Benzyl tris(2,4,6-trimethoxyphenyl)phosphonium chloride (BTPP-(2,4,6-MeO)-Cl) (cation (3)): <sup>1</sup>H NMR (400 MHz, CDCl<sub>3</sub>) δ 7.05-7.03 (3H, m), 6.98-6.95 (2H, m), 6.04 (6H, d, *J*=4.8 Hz), 4.59 (2H, d, *J*=17.2 Hz), 3.85 (9H, s), 3.61 (18H, s). <sup>31</sup>P NMR (161 MHz, CDCl<sub>3</sub>) δ 5.71 (s). Yield: 94 wt%.

Benzyl (tris(2,6-trimethoxyphenyl)phosphonium chloride (BTPP-(2,6-MeO)-Cl) (cation (5)): <sup>1</sup>H NMR (400 MHz, CDCl<sub>3</sub>) δ 7.45 (3H, t, *J* = 8.8 Hz), 7.03-6.97 (5H, m), 6.53 (6H, dd, *J* = 8.4, 5.2 Hz), 4.72 (2H, d, *J* = 17.6 Hz), 3.61 (18H, s). <sup>31</sup>P NMR (161 MHz, CDCl<sub>3</sub>) δ 7.85 (s). Yield: 89 wt%.

Benzyl tris(*o*-methoxyphenyl)phosphonium chloride (BTPP-(*o*-MeO)-Cl) (cation (7)): <sup>1</sup>H NMR (400 MHz, CDCl<sub>3</sub>) δ 7.77 (3H, t, *J* = 7.6 Hz), 7.26 (3H, td, *J* = 12.8, 1.6 Hz), 7.18-7.13 (9H, m), 6.97 (2H, dd, *J* = 17.6, 1.6 Hz), 4.59 (2H, d, *J* = 16.0 Hz), 3.66 (9H, s). <sup>31</sup>P NMR (161 MHz, CDCl<sub>3</sub>) δ 24.7 (s). Yield: 87 wt%.

Benzyl tris(*p*-methoxyphenyl)phosphonium chloride (BTPP-(*p*-MeO)-Cl) (cation 10): <sup>1</sup>H NMR (400 MHz, CDCl<sub>3</sub>) δ 7.52-7.46 (6H, m), 7.22-7.17 (1H, m), 7.13-6.99 (10H, m), 4.96 (2H, d, *J*=14.0 Hz), 3.86 (9H, s). <sup>31</sup>P NMR (161 MHz, CDCl<sub>3</sub>) δ 21.1 (s). Yield: 92 wt%.

Benzyl tris(*p*-methylphenyl)phosphonium chloride (BTPP-(*p*-Me)-Cl) (cation 11): <sup>1</sup>H NMR (400 MHz, CDCl<sub>3</sub>) δ 7.57-7.51 (6H, m), 7.42-7.38 (6H, m), 7.24-7.19 (1H, m),

7.15-7.11 (2H, m), 7.08-7.05 (2H, m), 5.24 (2H, d,  $J=14.4$  Hz), 2.46 (9H, s).  $^{31}\text{P}$  NMR (161 MHz,  $\text{CDCl}_3$ )  $\delta$  22.2 (s). Yield: 88 wt%.

Benzyl triphenylphosphonium chloride (BTPP-Cl) (cation 12):  $^1\text{H}$  NMR (400 MHz,  $\text{CDCl}_3$ )  $\delta$  7.77-7.71 (9H, m), 7.63-7.59 (6H, m), 7.22-7.17 (1H, m), 7.13-7.07 (4H, m), 5.50 (2H, d,  $J=14.8$  Hz).  $^{31}\text{P}$  NMR (161 MHz,  $\text{CDCl}_3$ )  $\delta$  23.3 (s). Yield: 85 wt%.

### **Alkaline stability tests of QP cations**

1 M deuterated potassium hydroxide (KOD) in  $\text{CD}_3\text{OD}/\text{D}_2\text{O}$  (5/1 vol) solution was prepared by dissolving KOD (40 wt% in  $\text{D}_2\text{O}$ , 4.28 g, 30.0 mmol) in a mixture of deuterated methanol and heavy water ( $\text{CD}_3\text{OD}/\text{D}_2\text{O}$ ) (25 mL/2.67 mL). QP cations (1.00 mmol) was added to the alkaline solution to obtain a molar ratio of 30 KOD : 1 model compound (i.e., 0.033 M). The mixture was placed in a fluoropolymer lined autoclave held at 80 °C. Before the test ( $t = 0$ ), an aliquot of the testing solution was removed and analyzed by  $^{31}\text{P}$  NMR spectroscopy to determine the initial quantity of the QP cation. Then, the testing solution was held at 80 °C. Aliquots of the reaction mixture were removed periodically and analyzed by  $^{31}\text{P}$  NMR spectroscopy to determine the quantity of the QP cation remaining. A control sample with the same recipe but without adding KOD was prepared, and its  $^{31}\text{P}$  NMR were also measured.

### **Calculation of the degradation rate constants ( $k$ ) of QP cations**

$k_{80}$  (the degradation rate constant at 80 °C) of cation (1)-(3) and (10)-(12) have been discussed in our previous work.<sup>[2]</sup>  $k_{80}$  of other cations studied in this work were calculated by correlating  $\ln(C_0/C)$  at 80 °C and time (Fig. S1-S12). Here,  $C_0$  is the initial QP cation concentration, and  $C$  is the QP cation concentration at the sampling time.

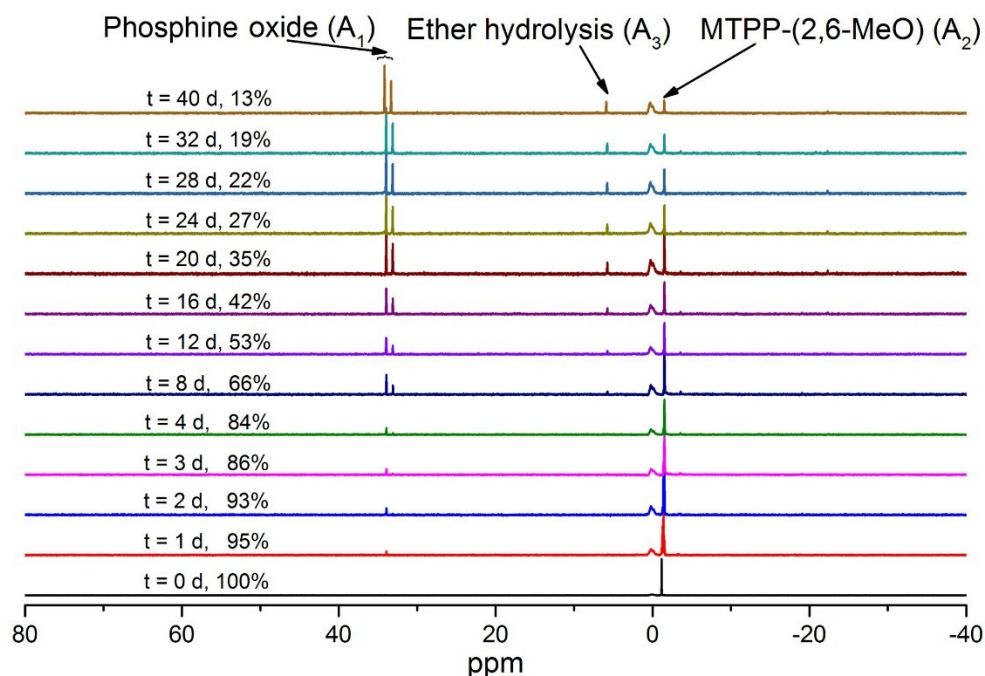

**Figure S1.** Time series of  $^{31}\text{P}$  NMR spectra during durability test of MTPP-(2,6-MeO) (cation (4)) at 80 °C. Phosphoric acid as the external standard; 1 M KOD in  $\text{CD}_3\text{OD}/\text{D}_2\text{O}$  (5/1 vol) as the solvent. The degradation percentage is calculated by  $A_2/(A_1 + A_2 + A_3)$ .  $A_1$  is the peak area of the phosphine oxide;  $A_2$  is the peak area of cation (4);  $A_3$  is the peak area of ether hydrolysis products.

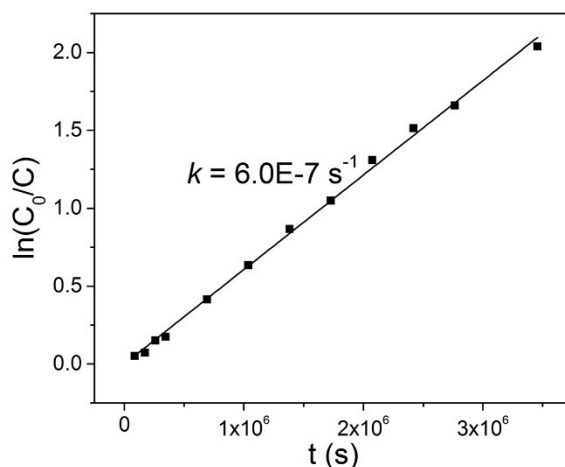

**Figure S2.** The plot of  $\ln(C_0/C)$  versus time of MTPP-(2,6-MeO) (cation (4)) at 80 °C. 1 M KOD in  $\text{CD}_3\text{OD}/\text{D}_2\text{O}$  (5/1 vol) as the solvent.

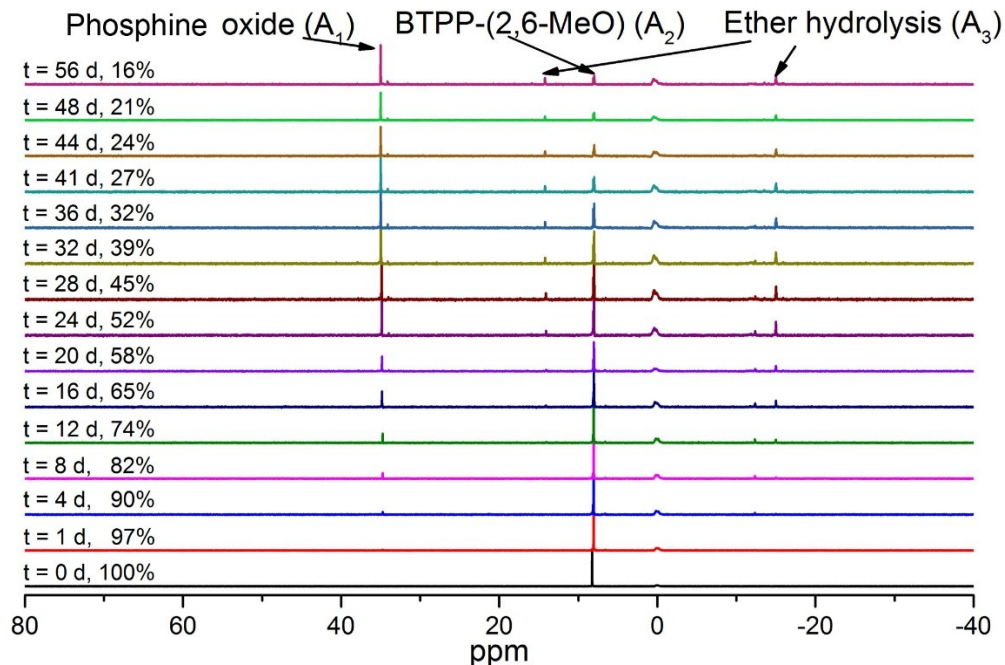

**Figure S3.** Time series of  $^{31}\text{P}$  NMR spectra during durability test of BTTPP-(2,6-MeO) (cation (5)) at 80 °C. Phosphoric acid as the external standard; 1 M KOD in  $\text{CD}_3\text{OD}/\text{D}_2\text{O}$  (5/1 vol) as the solvent. The degradation percentage is calculated by  $A_2/(A_1 + A_2 + A_3)$ .  $A_1$  is the peak area of the phosphine oxide;  $A_2$  is the peak area of cation (5);  $A_3$  is the peak area of ether hydrolysis products.

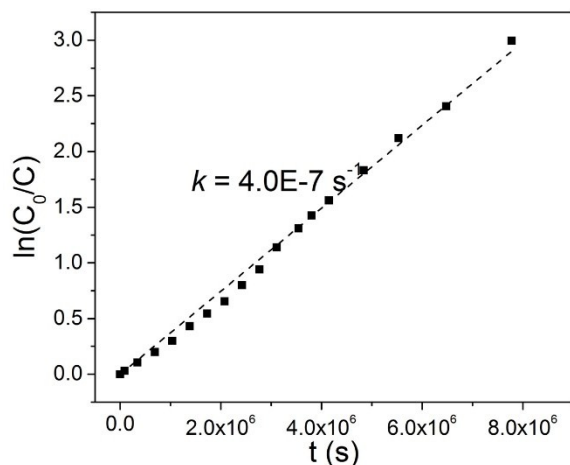

**Figure S4.** The plot of  $\ln(C_0/C)$  versus time of BTTPP-(2,6-MeO) (cation (5)) at 80 °C. 1 M KOD in  $\text{CD}_3\text{OD}/\text{D}_2\text{O}$  (5/1 vol) as the solvent.

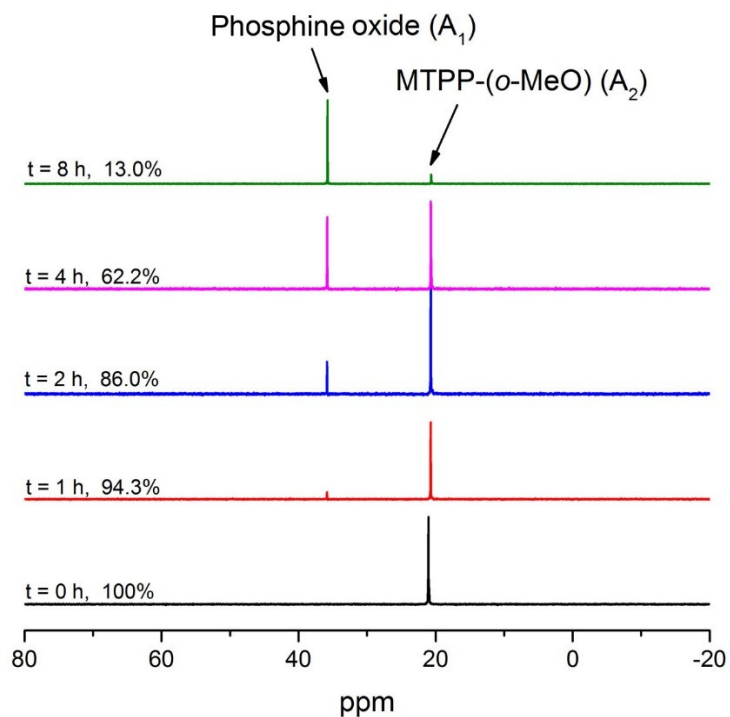

**Figure S5.** Time series of  $^{31}\text{P}$  NMR spectra during durability test of MTPP-(*o*-MeO) (cation (6)) at 80 °C. Phosphoric acid as the external standard; 1 M KOD in  $\text{CD}_3\text{OD}/\text{D}_2\text{O}$  (5/1 vol) as the solvent. The degradation percentage is calculated by  $A_2/(A_1 + A_2)$ .  $A_1$  is the peak area of the phosphine oxide;  $A_2$  is the peak area of cation (6).

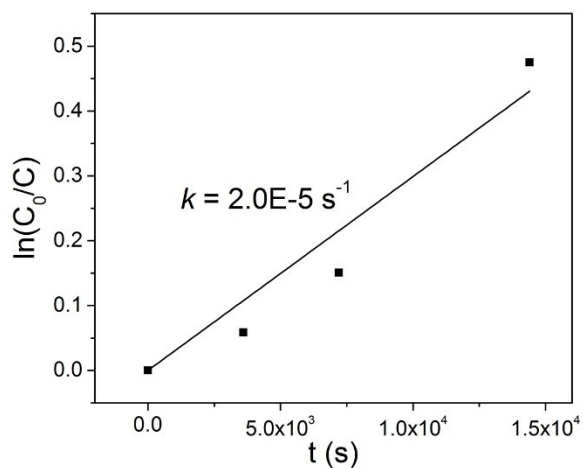

**Figure S6.** The plot of  $\ln(C_0/C)$  versus time of MTPP-(*o*-MeO) (cation (6)) at 80 °C. 1 M KOD in  $\text{CD}_3\text{OD}/\text{D}_2\text{O}$  (5/1 vol) as the solvent.

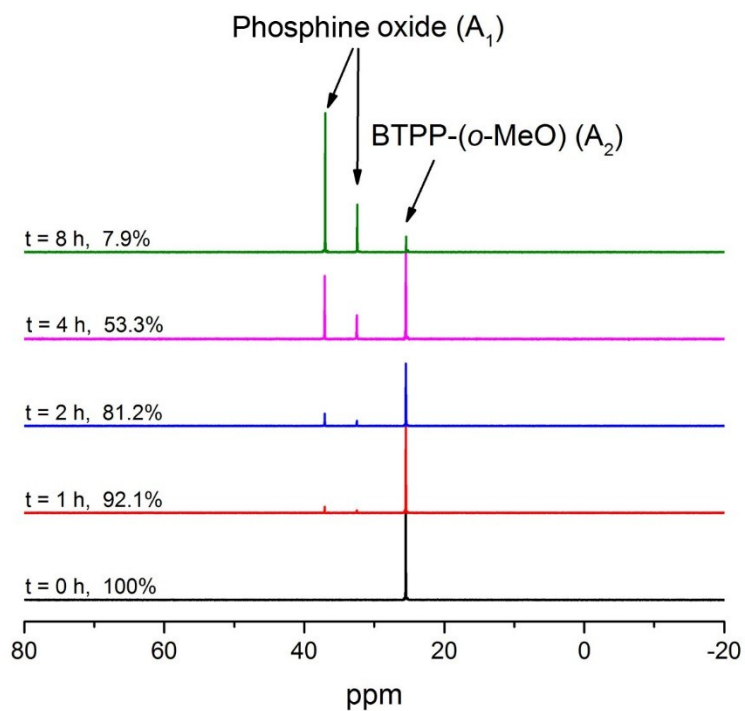

**Figure S7.** Time series of  $^{31}\text{P}$  NMR spectra during durability test of BTTPP-(*o*-MeO) (cation (7)) at 80 °C. Phosphoric acid as the external standard; 1 M KOD in  $\text{CD}_3\text{OD}/\text{D}_2\text{O}$  (5/1 vol) as the solvent. The degradation percentage is calculated by  $A_2/(A_1 + A_2)$ .  $A_1$  is the peak area of the phosphine oxide;  $A_2$  is the peak area of cation (7).

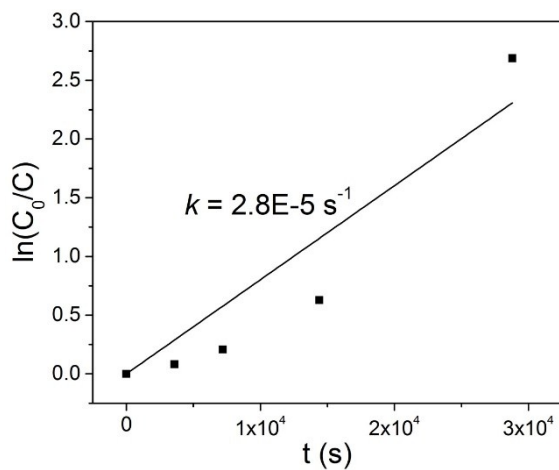

**Figure S8.** The plots of  $\ln(C_0/C)$  versus time of BTTPP-(*o*-MeO) (cation (7)) at 80 °C. 1 M KOD in  $\text{CD}_3\text{OD}/\text{D}_2\text{O}$  (5/1 vol) as the solvent.



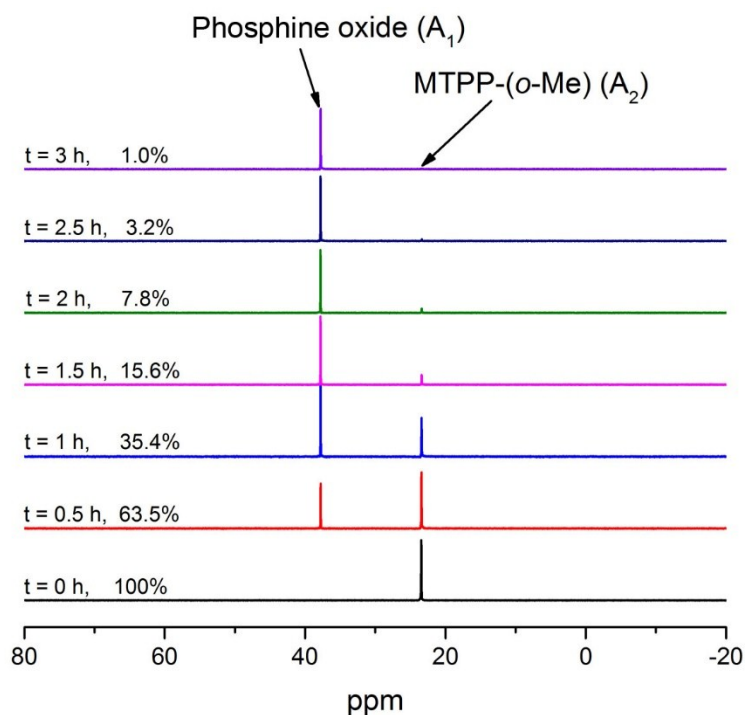

**Figure S9.** Time series of  $^{31}\text{P}$  NMR spectra during durability test of MTPP-(*o*-Me) (cation (8)) at 80 °C. Phosphoric acid as the external standard; 1 M KOD in  $\text{CD}_3\text{OD}/\text{D}_2\text{O}$  (5/1 vol) as the solvent. The degradation percentage is calculated by  $A_2/(A_1 + A_2)$ .  $A_1$  is the peak area of the phosphine oxide;  $A_2$  is the peak area of (cation (8)).

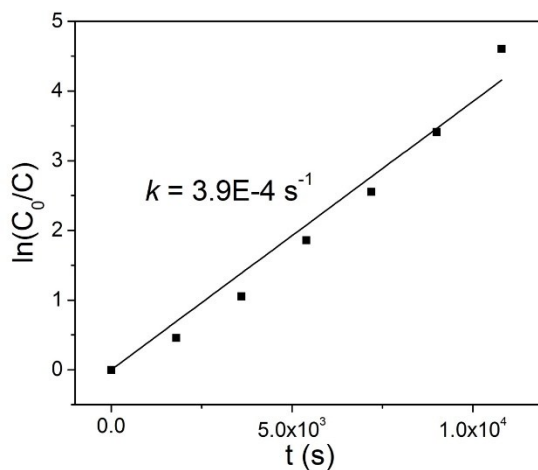

**Figure S10.** The plot of  $\ln(C_0/C)$  versus time of MTPP-(*o*-Me) (cation (8)) at 80 °C. 1 M KOD in  $\text{CD}_3\text{OD}/\text{D}_2\text{O}$  (5/1 vol) as the solvent.

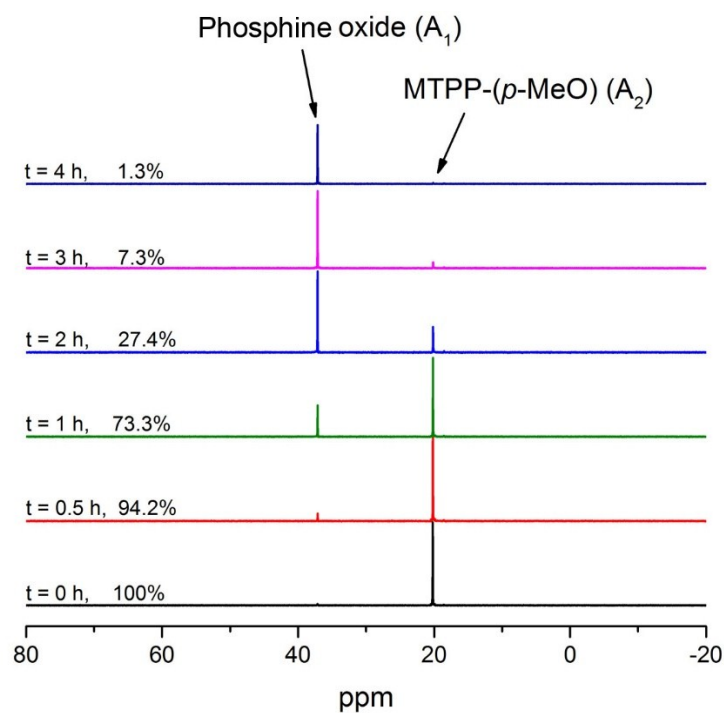

**Figure S11.** Time series of  $^{31}\text{P}$  NMR spectra during durability test of MTPP-(*p*-MeO) (cation (9)) at 80 °C. Phosphoric acid as the external standard; 1 M KOD in  $\text{CD}_3\text{OD}/\text{D}_2\text{O}$  (5/1 vol) as the solvent. The degradation percentage is calculated by  $A_2/(A_1 + A_2)$ .  $A_1$  is the peak area of MTPP-(*p*-MeO) oxide;  $A_2$  is the peak area of (cation (9)).

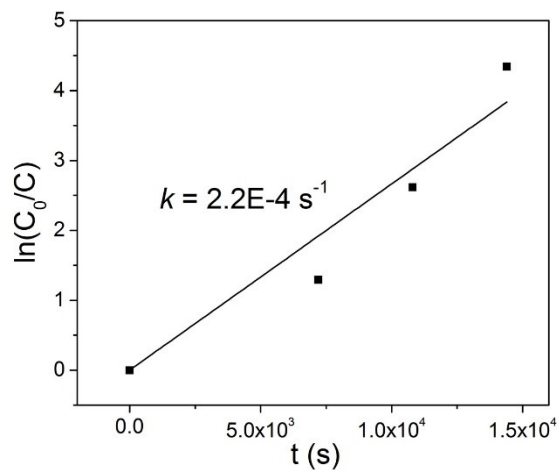

**Figure S12.** Plots of  $\ln(C_0/C)$  versus time of MTPP-(*p*-MeO) (cation (9)) at 80 °C. 1 M KOD in  $\text{CD}_3\text{OD}/\text{D}_2\text{O}$  (5/1 vol) as the solvent.

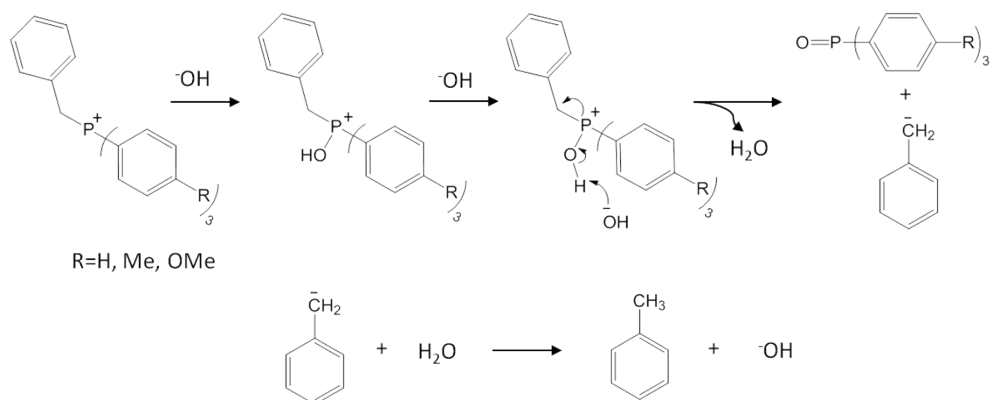

**Figure S13.** Oxide formation degradation pathway of QP cations in alkaline media.<sup>[3]</sup>

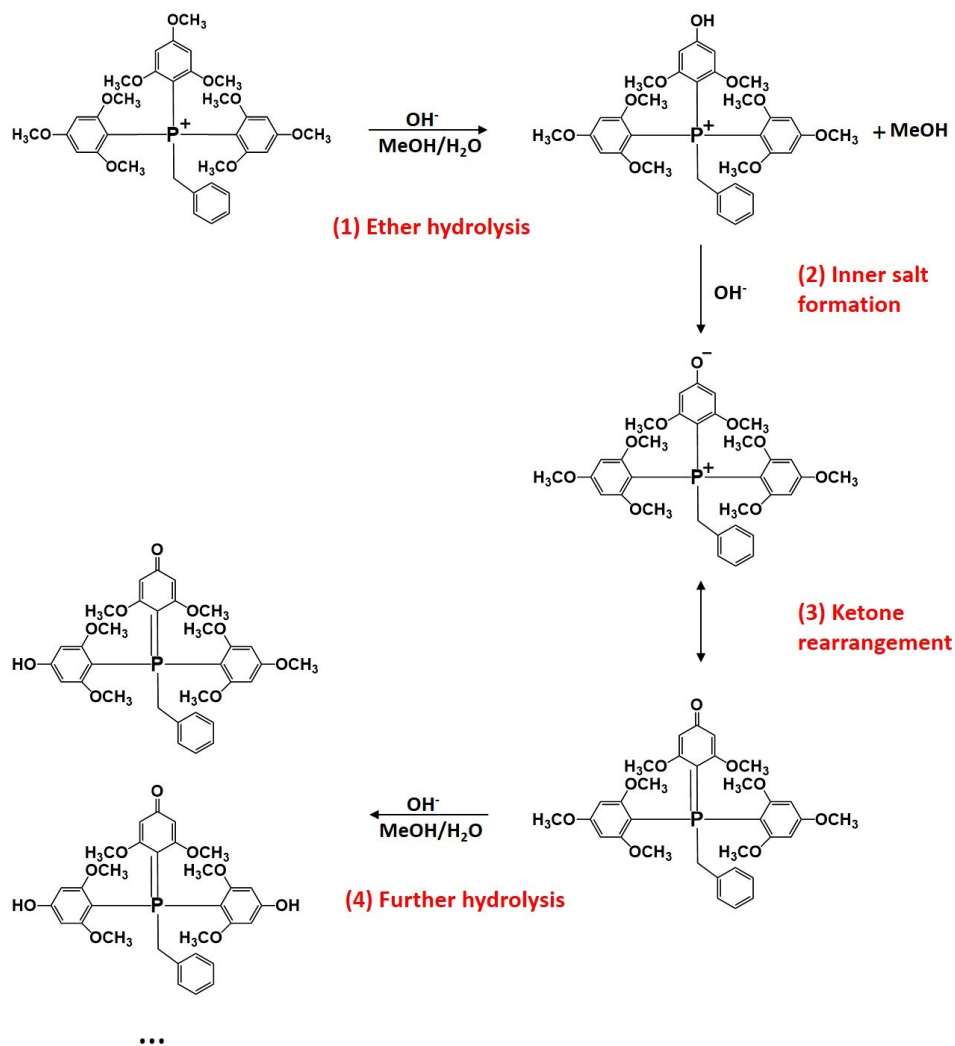

**Figure S14.** Ether hydrolysis degradation pathway of QP cations in alkaline media.<sup>[2]</sup>

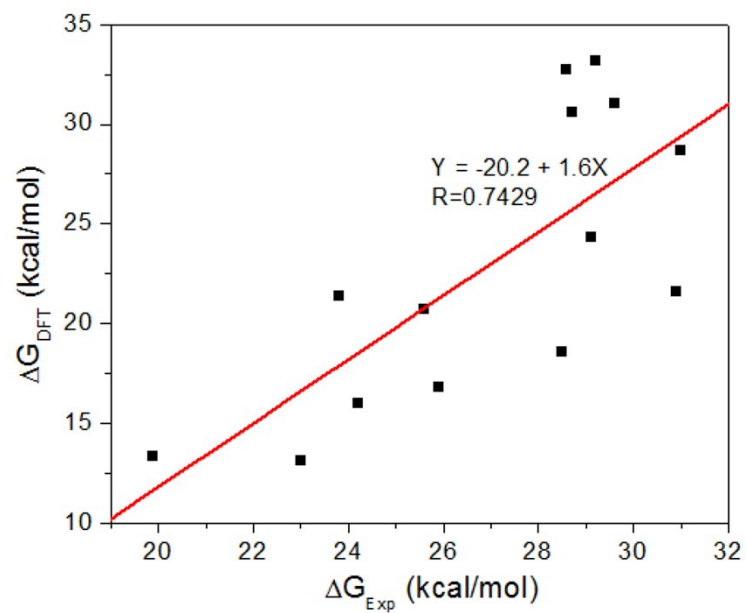

**Figure S15.** Experimentally measured  $\Delta G^\ddagger$  vs. DFT calculated  $\Delta G^\ddagger$  using M06/6-311++G(2d,p) method and SMD solvation model.

**Table S1.** Degradation mechanisms of QP cations studied in this work.

|                                                                                              |  |
|----------------------------------------------------------------------------------------------|--|
| <p>Oxidation formation<br/> <math>k_{EH} \ll k_{OF}</math><br/> <math>k = k_{OF}</math></p>  |  |
|                                                                                              |  |
| <p>Oxidation formation<br/> &amp; Ether hydrolysis<br/> <math>k = k_{EH} + k_{OF}</math></p> |  |
| <p>Ether hydrolysis<br/> <math>k_{EH} \gg k_{OF}</math><br/> <math>k = k_{EH}</math></p>     |  |

## REFERENCES

- [1] Alyea, E. C.; Malito J., Non-metal Derivatives of the Bulkiest Known Tertiary Phosphine, Trimesitylphosphine. *Phosphorus Sulfur*. **1989**, *46*, 175-181.
- [2] Zhang, B.; Kaspar, B. R.; Gu, S.; Wang, J.; Zhuang, Z.; Yan, Y., A New Alkali-stable Phosponium Cation Based on Fundamental Understanding of Degradation Mechanisms. *Chemsuschem* **2016**, *9*, 2374-2379.
- [3] Zanger, M.; Vanderwerf, C. A.; McEwen, W. E.; Kinetic Study of the Decomposition of Quaternary Phosponium Hydroxide. *J. Am. Chem. Soc.* **1959**, *81*, 3806-3807.
